# Supplementary material for: Patchy stereocomplex micelles as efficient compatibilizers for polymer blends
Source: Royal Society of Chemistry journal article supplement (doi:10.1039/d4py00449c), 2024-01-01
Supplement: d4py00449c1.pdf [file d4py00449c1.pdf]

## Supplementary Information

### **Patchy Stereocomplex Micelles as Efficient Compatibilizers for Polymer Blends**

*Roman Schaller,<sup>a</sup> Marius Schmidt,<sup>a</sup> Kristian Schweimer<sup>b,c</sup> and Holger Schmalz<sup>a,d\*</sup>*

R. Schaller, M. Schmidt, Dr. Kristian Schweimer, Dr. H. Schmalz

<sup>a</sup> Macromolecular Chemistry, University of Bayreuth, Universitätsstraße 30, 95447 Bayreuth (Germany)

<sup>b</sup> Biochemistry IV, Biophysical Chemistry, University of Bayreuth, Universitätsstraße 30, 95447 Bayreuth (Germany)

<sup>c</sup> Northern Bavarian NMR Center, University of Bayreuth, Universitätsstraße 30, 95447 Bayreuth (Germany)

<sup>d</sup> Bavarian Polymer Institute, Universitätsstraße 30, 95447 Bayreuth (Germany)

E-mail: [holger.schmalz@uni-bayreuth.de](mailto:holger.schmalz@uni-bayreuth.de)

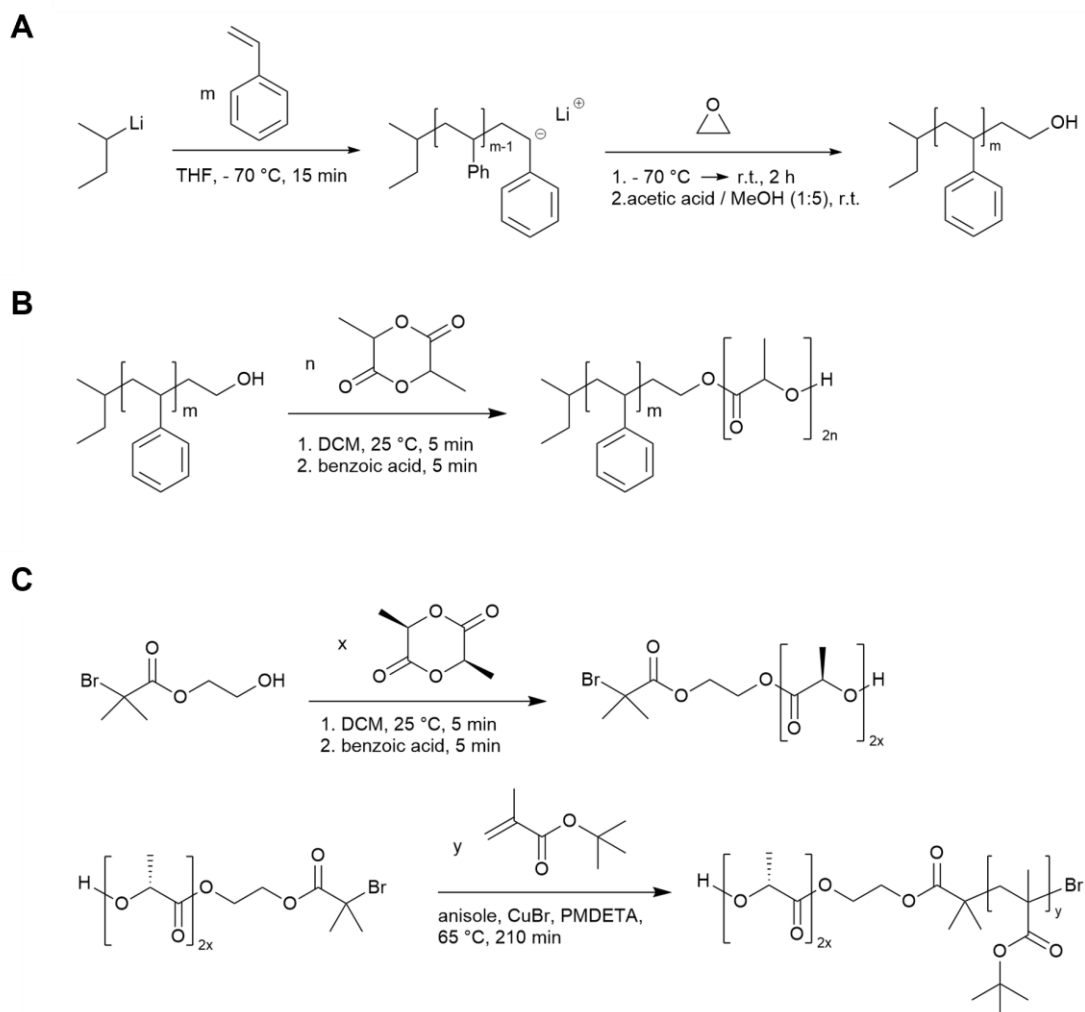

**Scheme S1:** Synthesis of A) PS-OH, B) PS-*b*-PLLA or PS-*b*-PDLA and C) PDLA-*b*-PtBMA diblock copolymers.

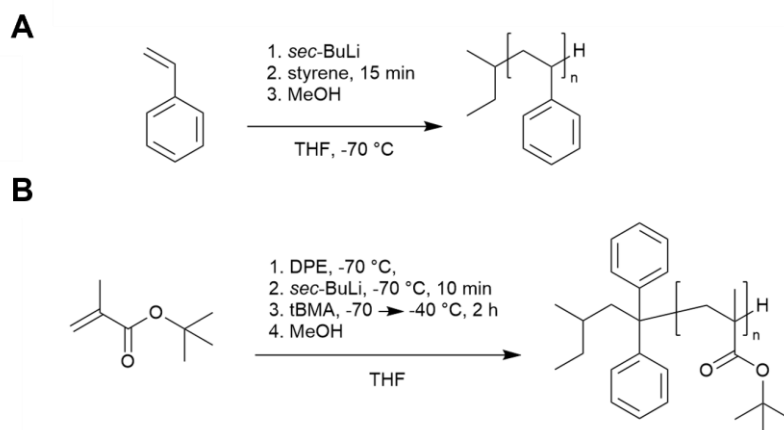

**Scheme S2:** Synthesis of A) PS and B) PtBMA homopolymers by living anionic polymerization.

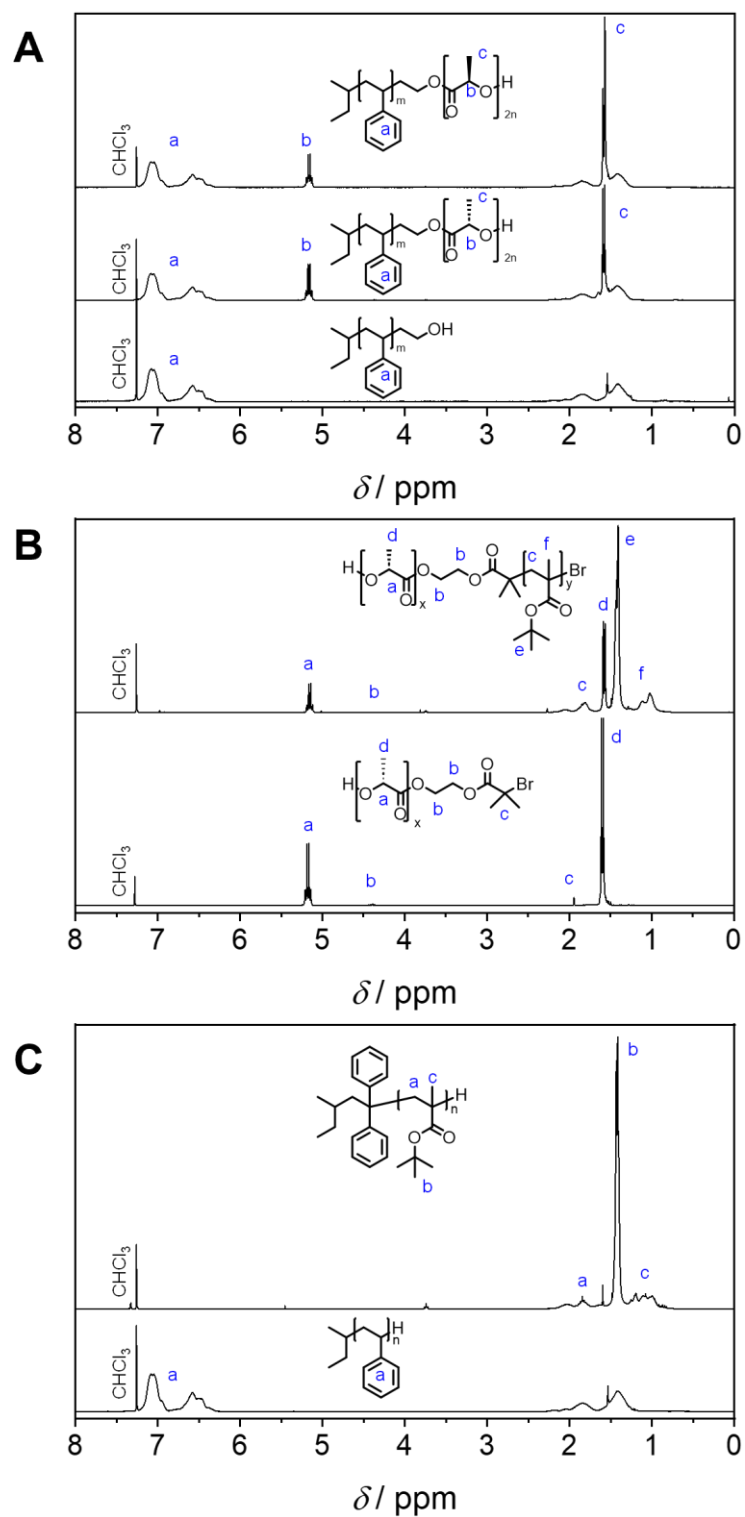

**Fig. S1:** <sup>1</sup>H NMR (CDCl<sub>3</sub>, 300 MHz) spectra of A) PS-OH, PS-*b*-PLLA, PS-*b*-PDLA, B) PDLA-Br, PDLA-*b*-PtBMA and C) PS, PtBMA.

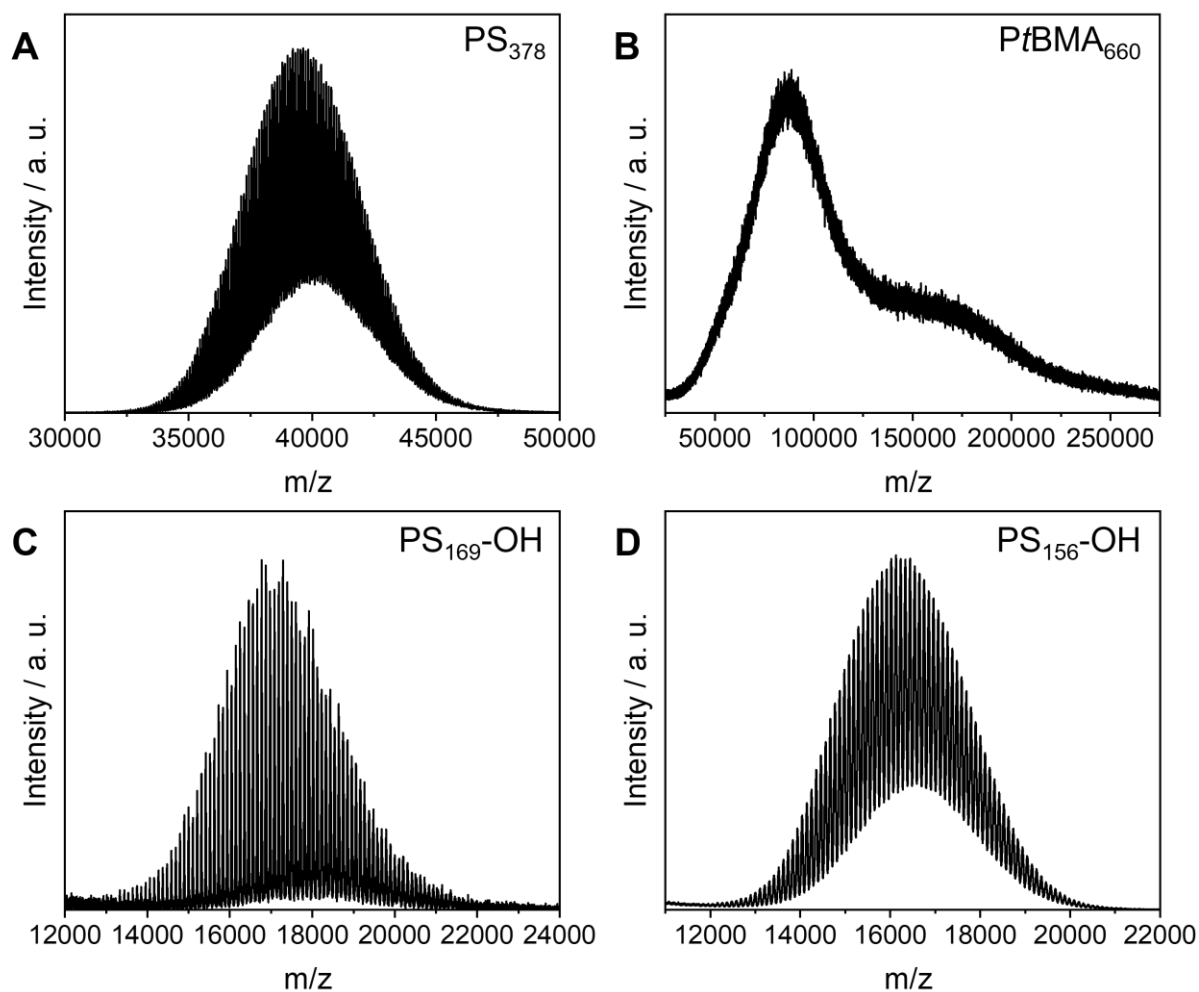

**Fig. S2:** MALDI-ToF MS spectra of A) PS, B) P/BMA (the shoulder at higher molecular weights is an artifact arising from the combination of two polymer chains with one cation), C) PS<sub>169</sub>-OH and D) PS<sub>156</sub>-OH (PS samples: DCTB, AgTFA; P/BMA: DCTB, NaTFA).

**Table S1:** Molecular characteristics of synthesized polymers.

| Sample                                           | Composition<br>(wt% / <i>DP</i> ) <sup>a</sup>                                                             | $M_n$ (NMR) <sup>a</sup><br>[g mol <sup>-1</sup> ] | $M_n$ (SEC) <sup>b</sup> | $\mathcal{D}$ <sup>b</sup> | $M_n$ (MS) <sup>c</sup><br>[g mol <sup>-1</sup> ] | $\mathcal{D}$ <sup>c</sup> |
|--------------------------------------------------|------------------------------------------------------------------------------------------------------------|----------------------------------------------------|--------------------------|----------------------------|---------------------------------------------------|----------------------------|
| PS                                               | - / S <sub>378</sub>                                                                                       | -                                                  | 41 500                   | 1.05                       | 39 400                                            | 1.0                        |
| P <i>t</i> BMA                                   | - / <i>t</i> BMA <sub>660</sub>                                                                            | -                                                  | 87 000                   | 1.06                       | 93 700                                            | 1.06                       |
| PS <sub>169</sub> -OH                            | - / S <sub>169</sub> EO <sub>1</sub>                                                                       | -                                                  | 19 600                   | 1.06                       | 17 600                                            | 1.0                        |
| PS <sub>156</sub> -OH                            | - / S <sub>156</sub> EO <sub>1</sub>                                                                       | -                                                  | 16 600                   | 1.06                       | 16 300                                            | 1.0                        |
| PDLA <sub>100</sub> -Br                          | - / DLA <sub>100</sub>                                                                                     | 7 500                                              | 13 500                   | 1.16                       |                                                   |                            |
| PDLA <sub>62</sub> -Br                           | - / DLA <sub>62</sub>                                                                                      | 4 600                                              | 6 300 <sup>d</sup>       | 1.09 <sup>d</sup>          |                                                   |                            |
| PDLA <sub>62</sub> -RB                           | - / DLA <sub>62</sub> RB <sub>1</sub>                                                                      | 5 200                                              | 6 700 <sup>d</sup>       | 1.10 <sup>d</sup>          |                                                   |                            |
| PS- <i>b</i> -PLLA                               | S <sub>70</sub> LLA <sub>30</sub> /<br>S <sub>169</sub> LLA <sub>106</sub>                                 | 25 300                                             | 27 900                   | 1.08                       |                                                   |                            |
| PS- <i>b</i> -PDLA                               | S <sub>68</sub> DLA <sub>32</sub> /<br>S <sub>156</sub> DLA <sub>106</sub>                                 | 24 000                                             | 30 000                   | 1.07                       |                                                   |                            |
| PS- <i>b</i> -PLLA-Br                            | S <sub>72</sub> LLA <sub>28</sub> /<br>S <sub>169</sub> LLA <sub>96</sub>                                  | 24 500                                             | 27 900                   | 1.10                       |                                                   |                            |
| PDLA- <i>b</i> -P <i>t</i> BMA                   | DLA <sub>28</sub> <i>t</i> BMA <sub>72</sub> /<br>DLA <sub>100</sub> <i>t</i> BMA <sub>132</sub>           | 26 200                                             | 35 100                   | 1.19                       |                                                   |                            |
| PS- <i>b</i> -PLLA- <i>b</i> -<br>P <i>t</i> BMA | S <sub>33</sub> LLA <sub>13</sub> T <sub>54</sub> /<br>S <sub>169</sub> LLA <sub>96</sub> T <sub>200</sub> | 52 600                                             | 42 200                   | 1.18                       |                                                   |                            |

a) determined from <sup>1</sup>H NMR (CDCl<sub>3</sub>, 300 MHz) using the ATRP end group or absolute  $M_n$  of the PS and PDLA precursor polymers (determined by MALDI-ToF MS or <sup>1</sup>H NMR spectroscopy) for internal signal calibration, respectively (*DP* = degree of polymerization)

b) determined from CHCl<sub>3</sub>-SEC (PS calibration),  $\mathcal{D}$  = molar mass dispersity

c) determined from MALDI-ToF MS

d) determined from THF-SEC (PS calibration)

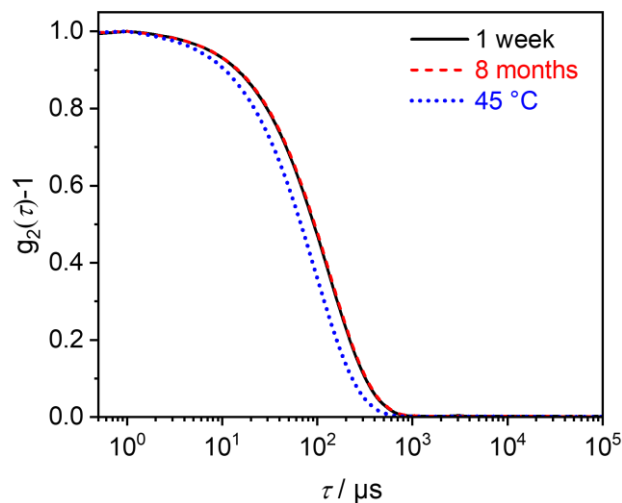

**Fig. S3:** Autocorrelation functions from DLS for SC micelles prepared from PS-*b*-PLLA/PDLA-*b*-PtBMA mixtures ( $c = 5 \text{ g L}^{-1}$ , CH) after aging for 1 week, 8 months, and at 45 °C.

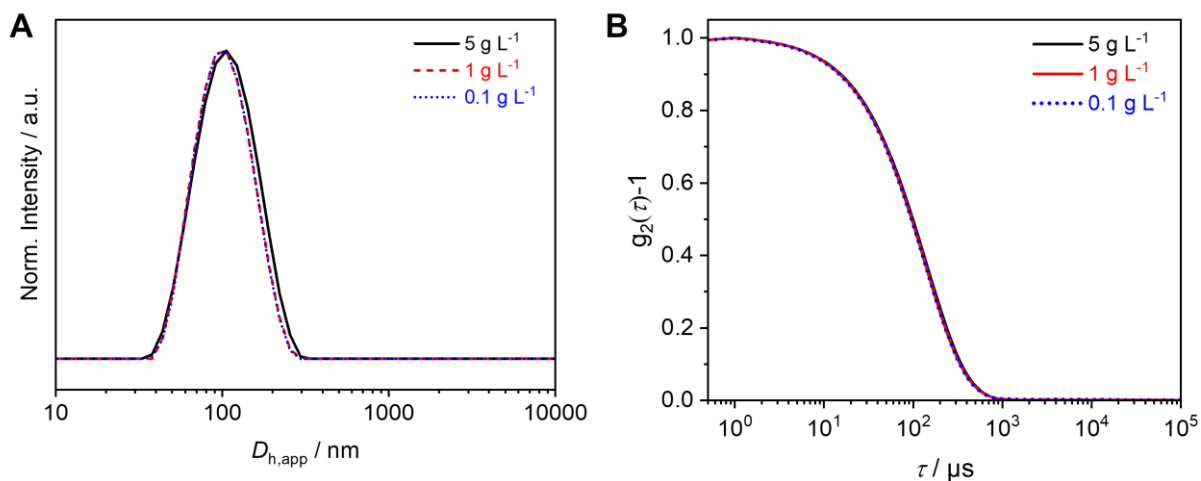

**Fig. S4:** DLS measurements of SC micelles in CH prepared from PS-*b*-PLLA/PDLA-*b*-PtBMA mixtures with a concentration of  $c = 5 \text{ g L}^{-1}$  and upon further dilution to  $c = 1$  and  $0.1 \text{ g L}^{-1}$ . A) Hydrodynamic diameter distributions and B) autocorrelation functions.

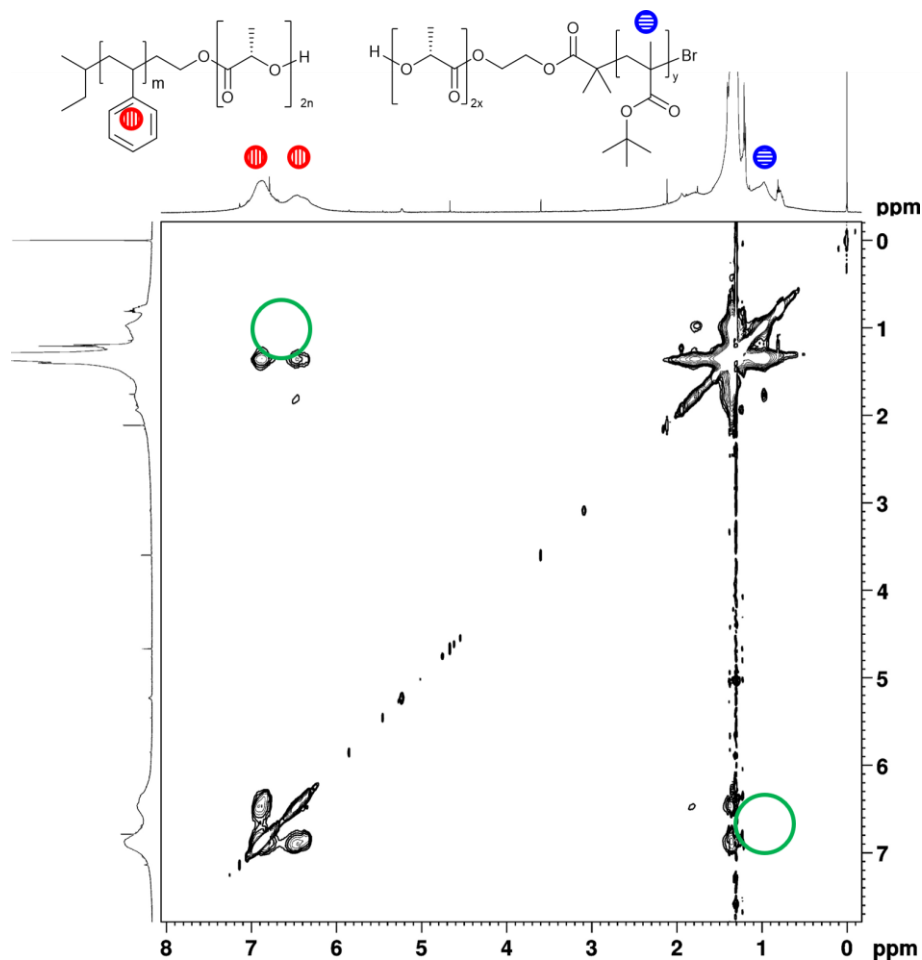

**Fig. S5:** Contour plot of a 2D  $^1\text{H}$  NOESY experiment on a SC micelle dispersion prepared from PS-*b*-PLLA/PDLA-*b*-PtBMA mixtures ( $c = 5 \text{ g L}^{-1}$ ,  $\text{CH-}d_{12}$ ). The green circles indicate the positions where cross-peaks would be expected in case of a mixed PS/PtBMA corona. In a mixed corona, the PS and PtBMA segments would be in close proximity, giving rise to magnetization transfer by cross-relaxation. Hence, the absence of those cross-peaks confirms that the microphase separation within the PS/PtBMA corona of the SC micelles is present already in the dispersed state.

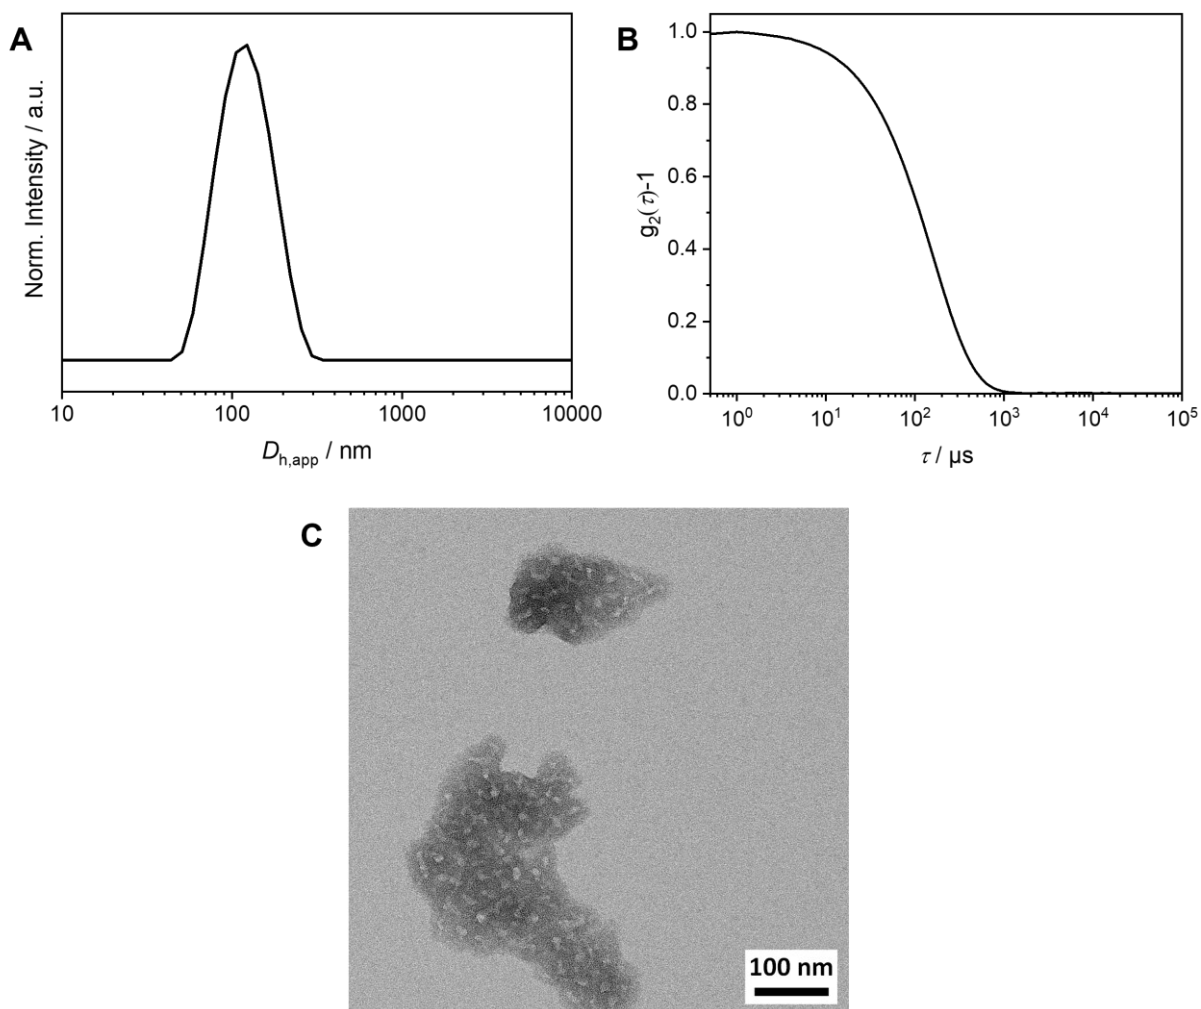

**Fig. S6:** A) Hydrodynamic diameter distribution and B) autocorrelation function of a PS-*sc*-PLA-PS micelle dispersion in CH ( $c = 5.0 \text{ g L}^{-1}$ ) determined by DLS. C) TEM micrograph of the respective micelles. The dispersion was prepared by adding a mixture of PS-*b*-PLLA and PS-*b*-PDLA in DCM ( $V = 2 \text{ mL}$ ,  $c = 50 \text{ g L}^{-1}$ ) to CH ( $V = 18 \text{ mL}$ ), subsequent evaporation of DCM and refilling with CH. PS was selectively stained with RuO<sub>4</sub> vapor and appears dark.



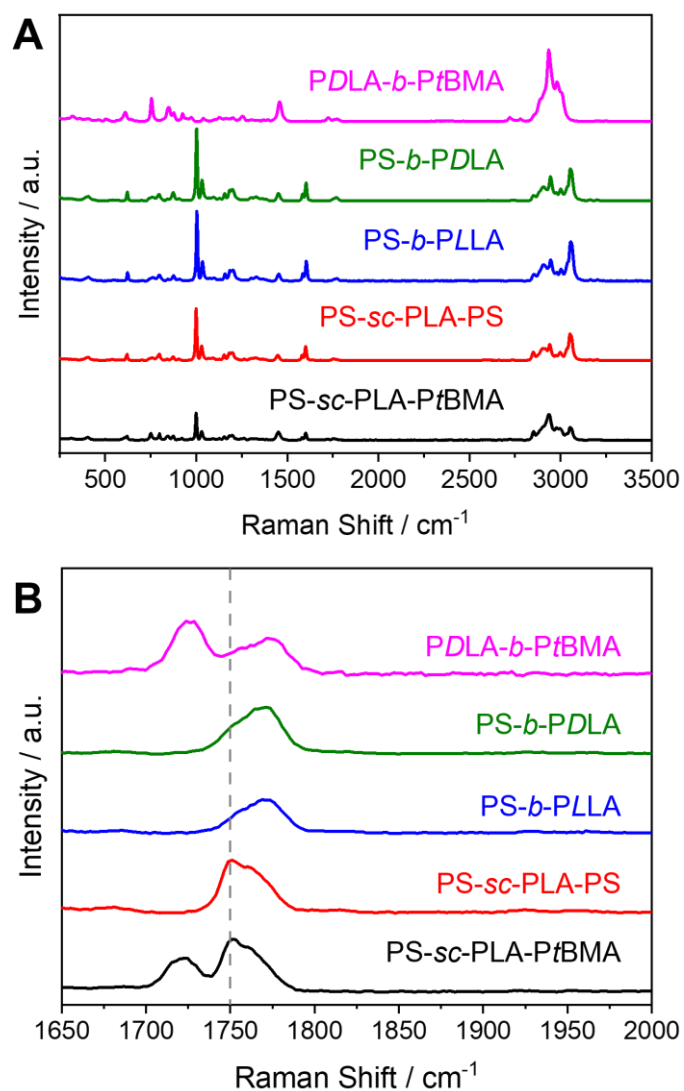

**Fig. S7:** Raman spectra of employed diblock copolymers and dried SC micelles. A) Full spectra and B) zoom-ins of the carbonyl stretching vibration regime (dashed line indicates location of SC specific band).

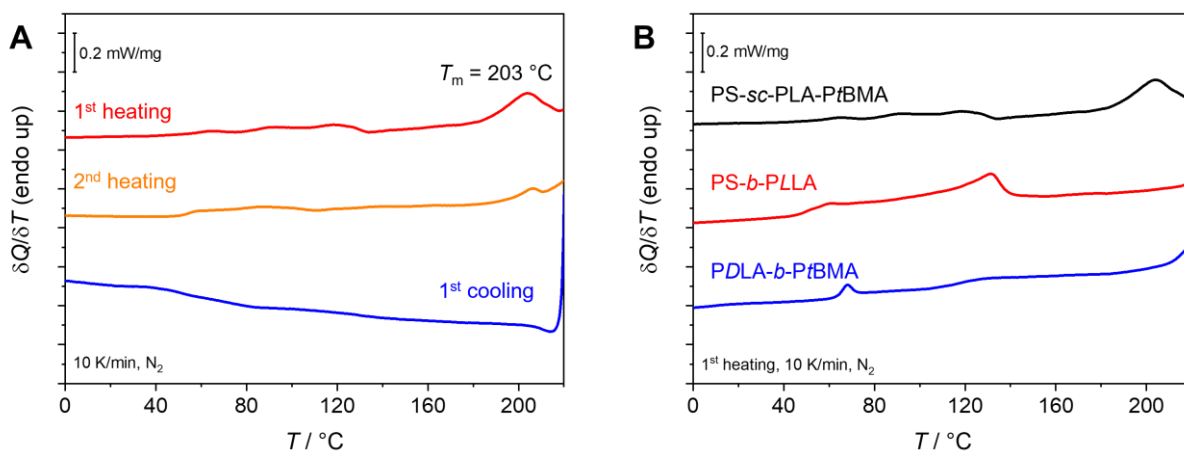

**Fig. S8:** A) DSC measurements of freeze-dried PS-*sc*-PLA-PtBMA micelles. B) 1<sup>st</sup> heating traces of freeze-dried PS-*sc*-PLA-PtBMA micelles and the respective diblock copolymers used for their preparation.

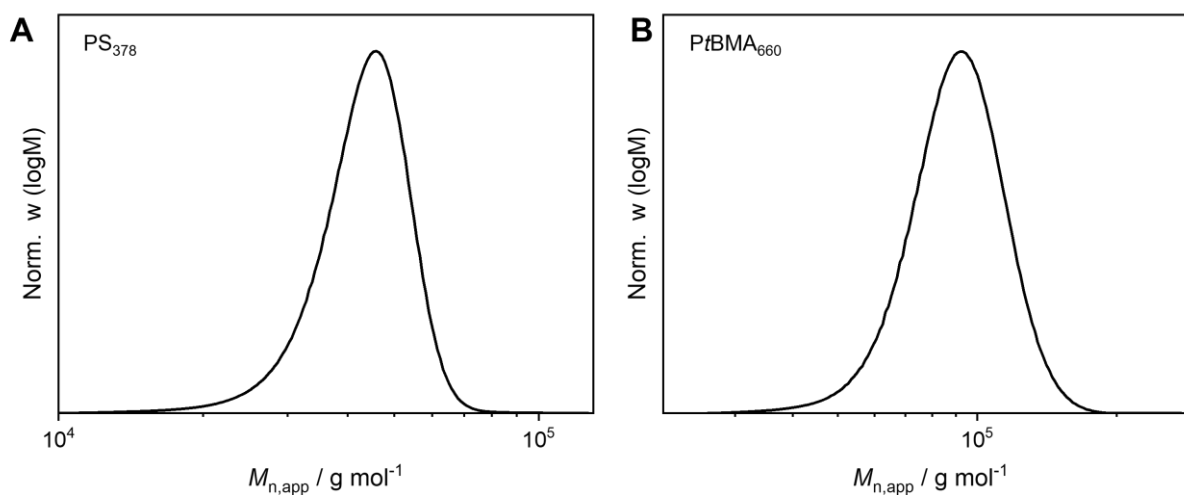

**Fig S9:** Apparent molecular weight distributions of A) PS and B) PtBMA homopolymers ( $\text{CHCl}_3$ -SEC, PS calibration).

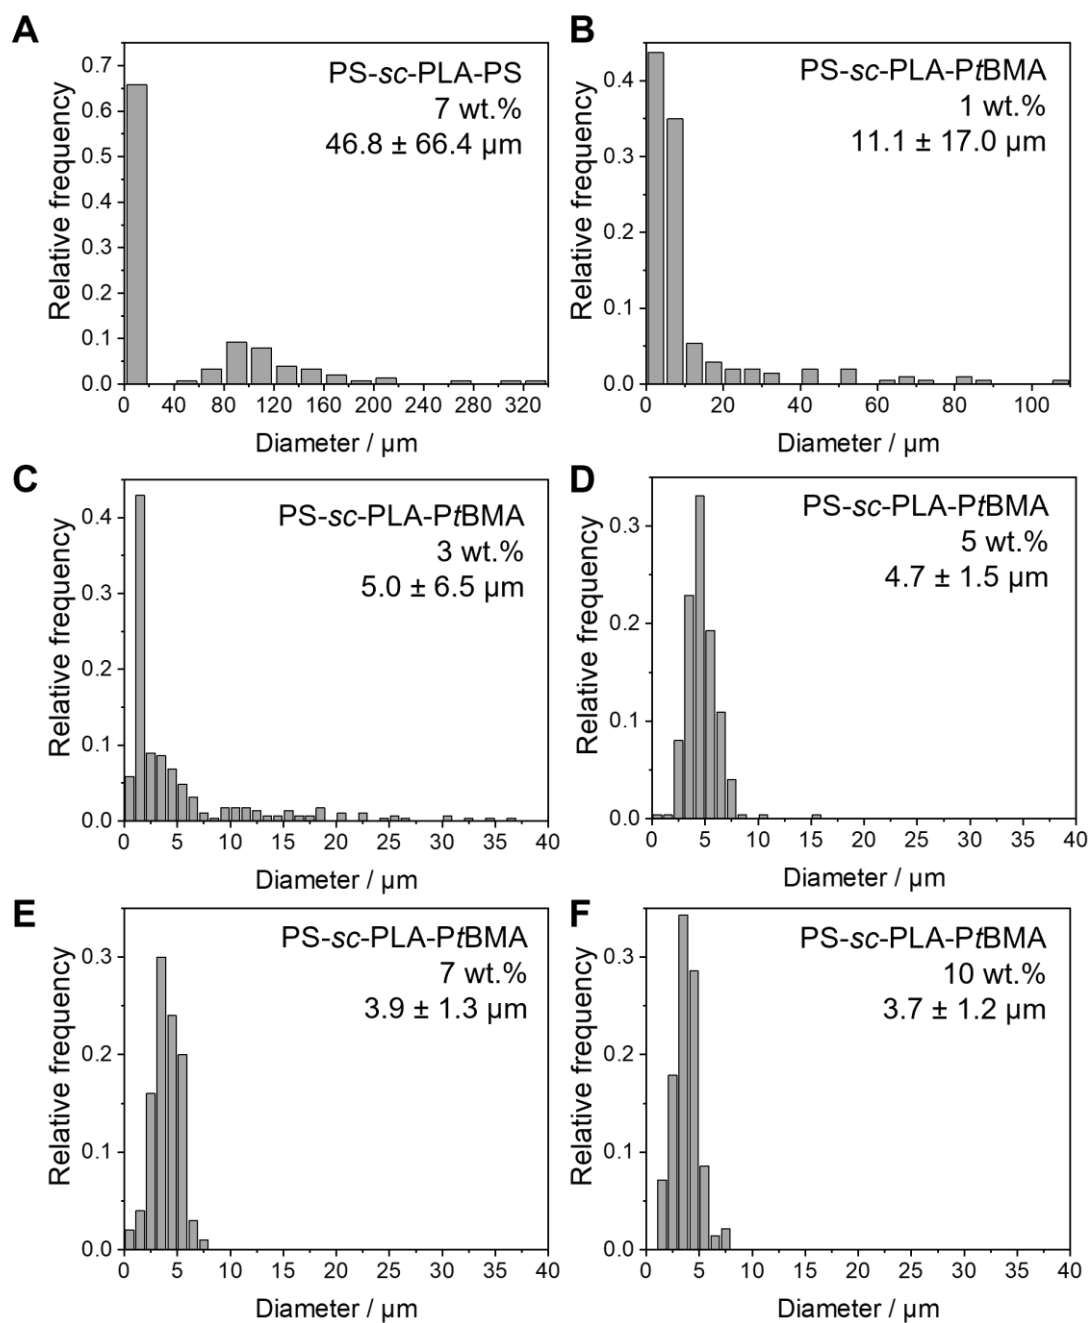

**Fig. S10:** Histograms of PS droplet diameter distributions determined by Raman imaging of PS/PtBMA (30/70 (w/w)) blends compatibilized with A) 7 wt% PS-*sc*-PLA-PS micelles or different amounts of patchy PS-*sc*-PLA-PtBMA micelles: B) 1, C) 3, D) 5, E) 7 and F) 10 wt%. For size evaluation at least 100 PS domains from different positions were counted.

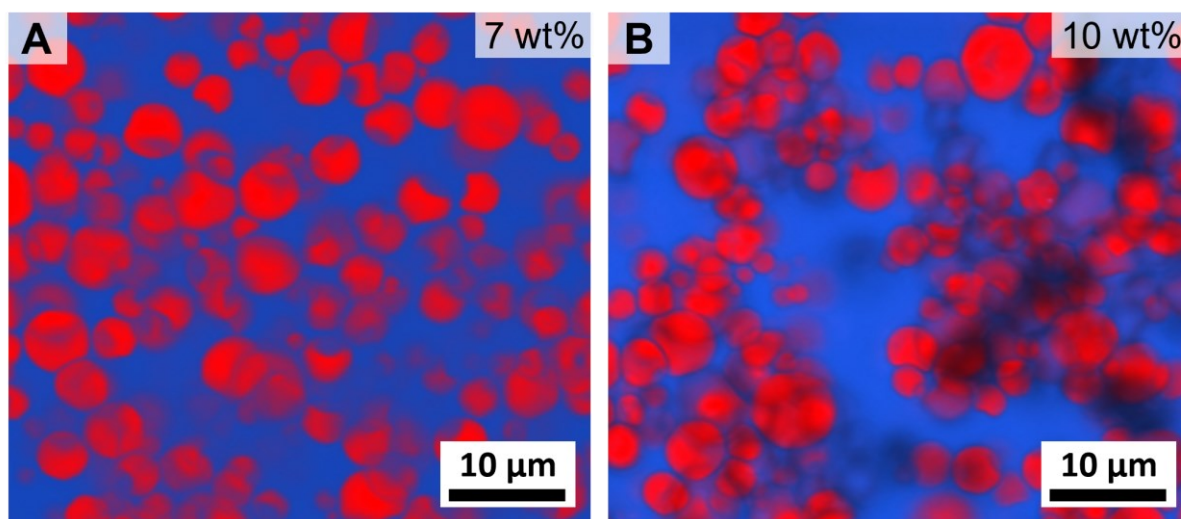

**Fig. S11:** Spatial component distribution at higher magnification extracted from Raman imaging for PS/PtBMA (30/70 (w/w)) blends compatibilized with A) 7 wt% and B) 10 wt% patchy PS-*sc*-PLA-PtBMA micelles. The domains colored in red represent PS droplets being dispersed in a continuous PtBMA matrix (depicted in blue).

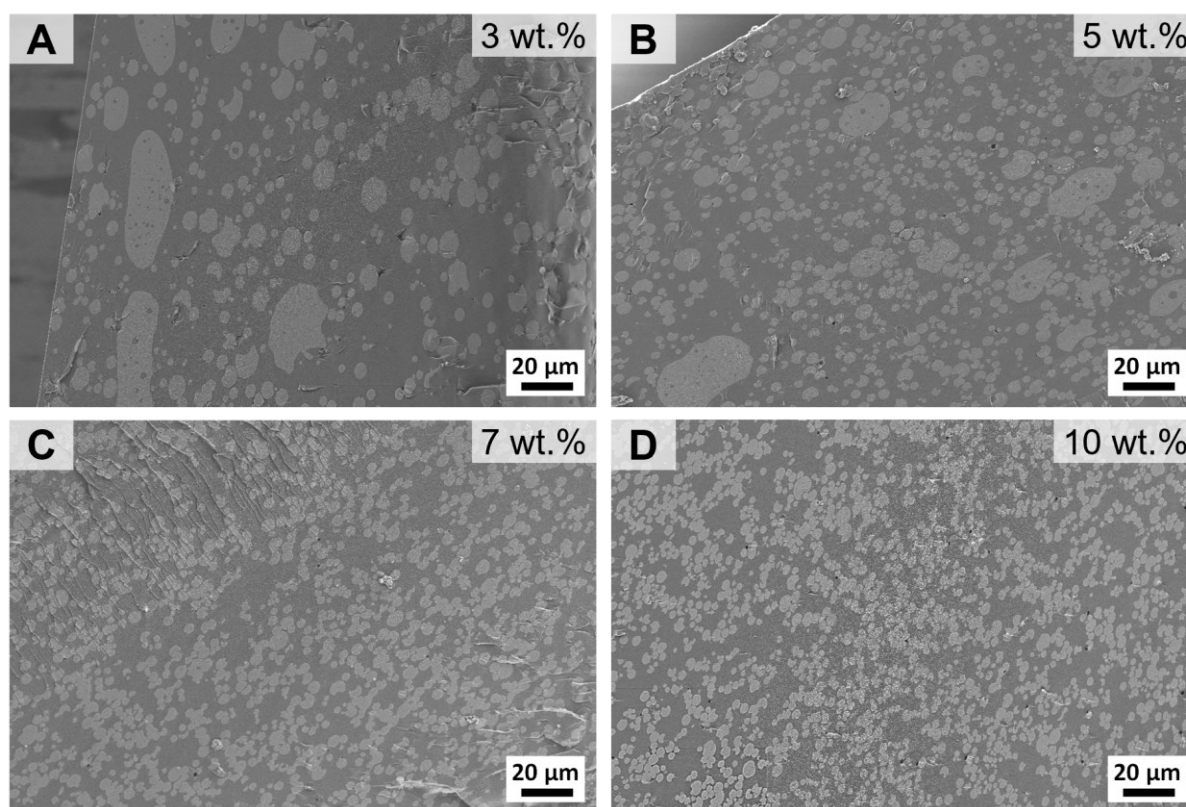

**Fig. S12:** Overview SEM images of the fracture surfaces of PS/PtBMA (30/70 (w/w)) blends compatibilized with A) 3, B) 5, C) 7 and D) 10 wt% patchy PS-*sc*-PLA-PtBMA micelles, taken at lower magnification. The PS domains were selectively stained with RuO<sub>4</sub> vapor to enhance contrast and appear bright.

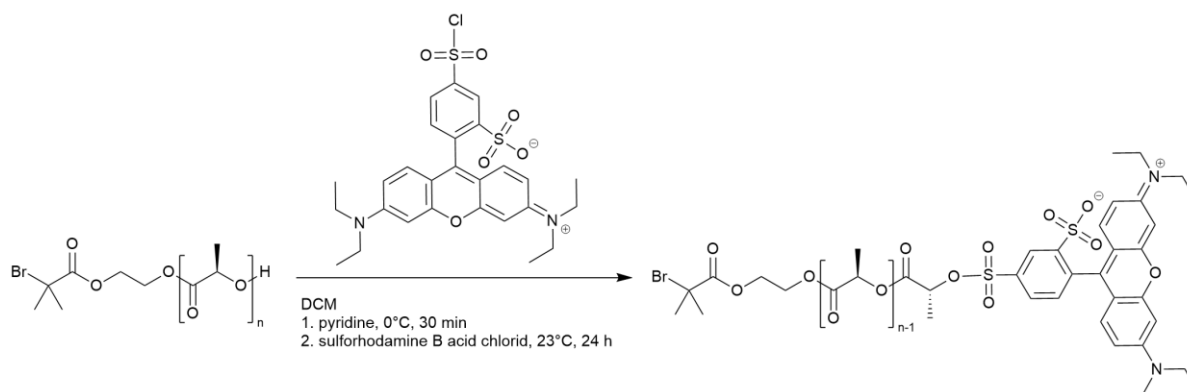

**Scheme S3:** Synthesis of fluorescently labelled PDLA homopolymer (PDLA<sub>62</sub>-RB).

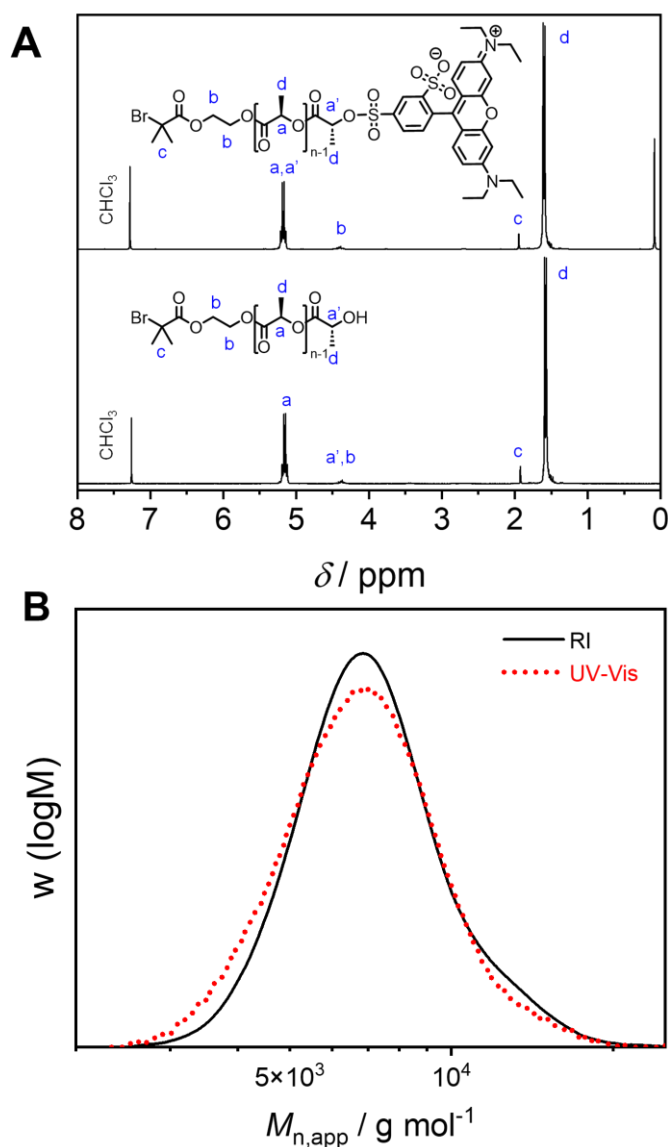

**Fig. S13:** A)  $^1\text{H}$  NMR ( $\text{CDCl}_3$ , 300 MHz) spectra of PDLA<sub>62</sub>-Br and PDLA<sub>62</sub>-RB. B) Apparent molecular weight distributions of PDLA<sub>62</sub>-RB (THF-SEC, PS calibration, UV-vis detector at  $\lambda = 580 \text{ nm}$ ). The identical RI and UV-vis traces for PDLA<sub>62</sub>-RB prove the successful end-functionalization of PDLA<sub>62</sub> with sulforhodamine B.

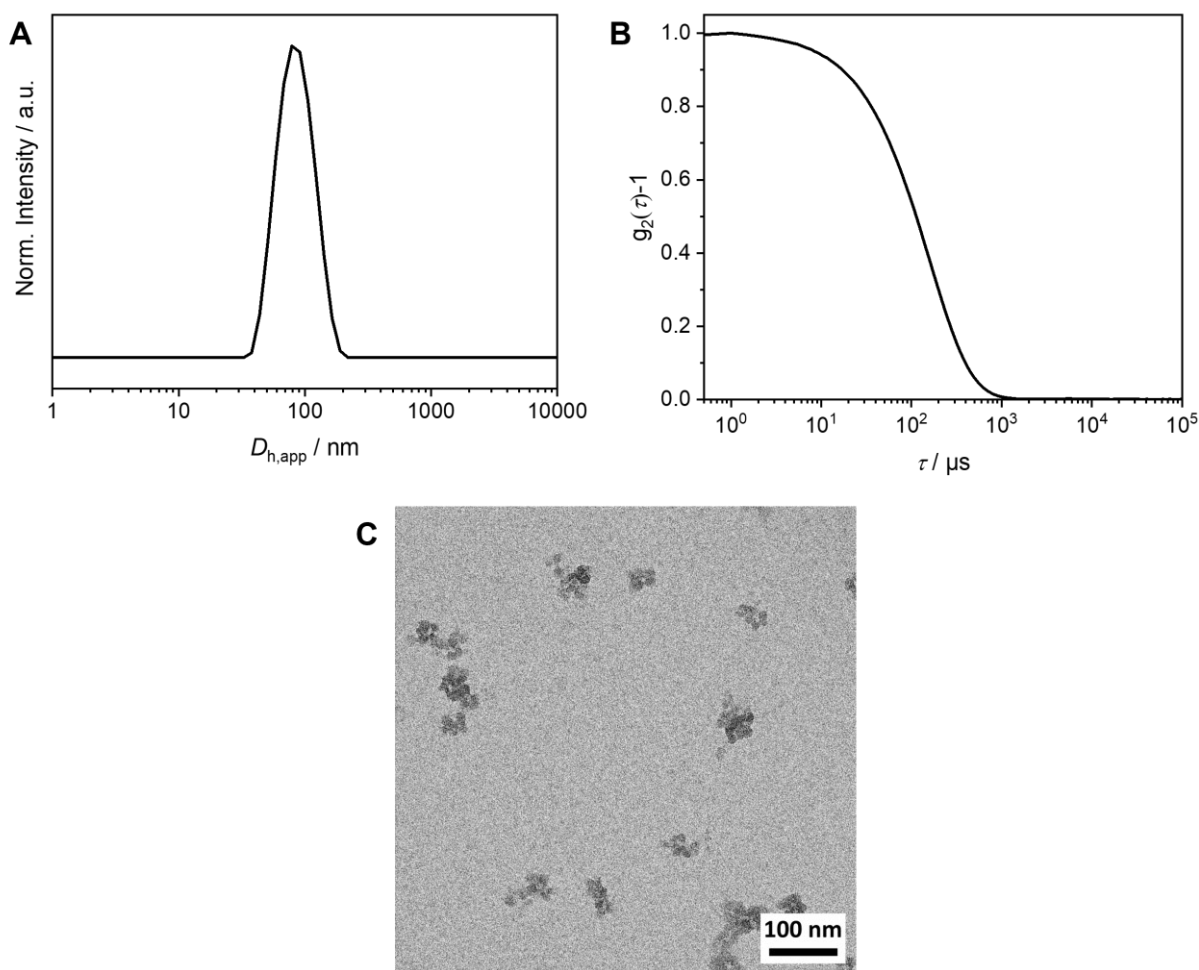

**Fig. S14:** A) Hydrodynamic diameter distribution and B) autocorrelation function of a PS-*sc*-PLA-*Pt*BMA<sub>RB</sub> micelle dispersion in CH ( $c = 1.0 \text{ g L}^{-1}$ ) determined by DLS. C) TEM micrograph of the respective micelles. The dispersion was prepared by the addition of a mixture of PS-*b*-PLLA, PS-*b*-PDLA and PDLA<sub>62</sub>-RB (10 wt% of total PDLA amount) in DCM ( $V = 300 \mu\text{L}$ ,  $c = 10 \text{ g L}^{-1}$ ) to CH ( $V = 2.7 \text{ mL}$ ), subsequent evaporation of DCM and refilling with CH. PS was selectively stained with RuO<sub>4</sub> vapor and appears dark.

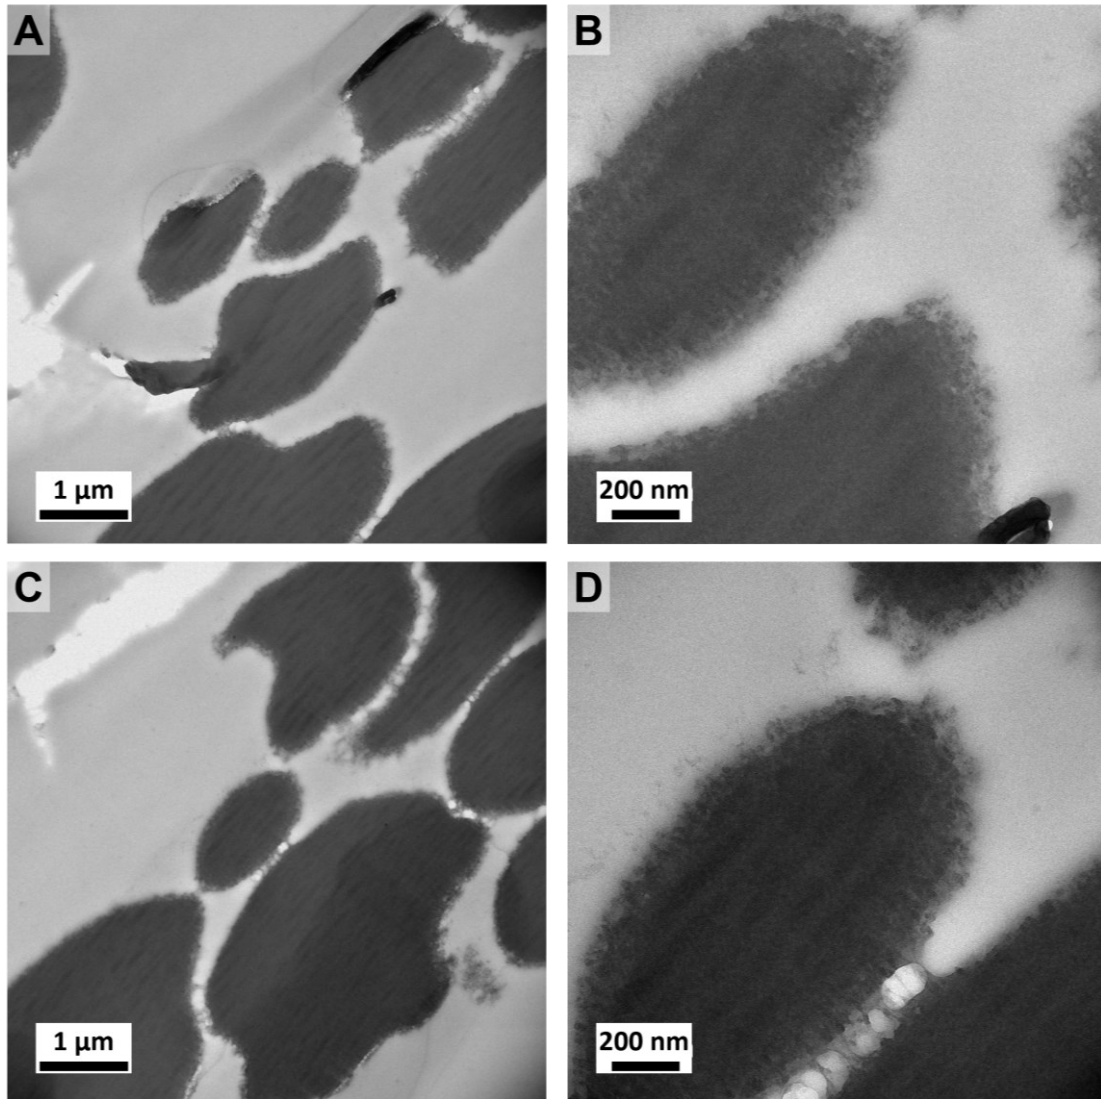

**Fig. S15:** TEM micrographs of a thin film of a PS/*Pt*BMA (30/70 (w/w)) blend compatibilized with 7 wt% patchy PS-*sc*-PLA-*Pt*BMA micelles. The PS domains were selectively stained with RuO<sub>4</sub> vapor to enhance contrast and appear dark.

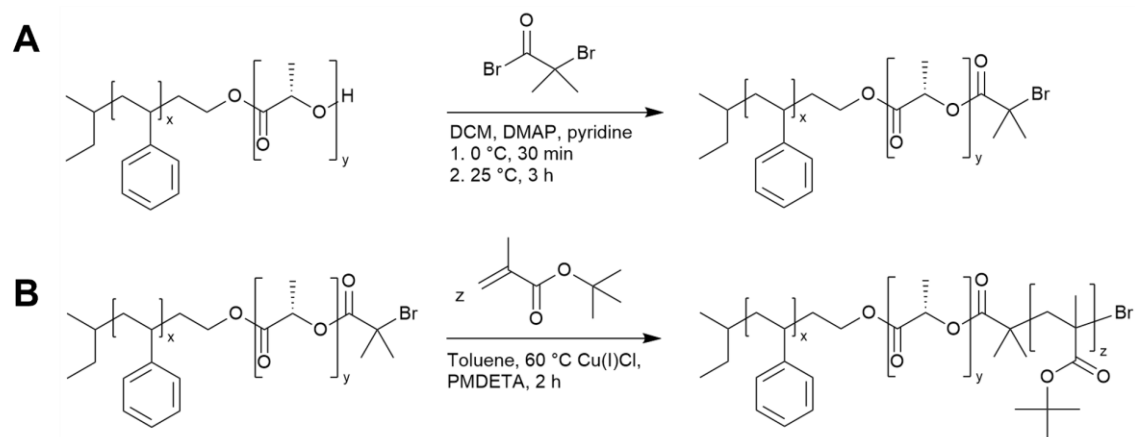

**Scheme S4:** Synthesis of A) the PS-*b*-PLLA-Br diblock copolymer end-functionalized with an ATRP initiating site ( $S_{169}LLA_{96}$ -Br) and B) the PS-*b*-PLLA-*b*-PtBMA triblock terpolymer ( $S_{169}LLA_{96}T_{200}$ ).

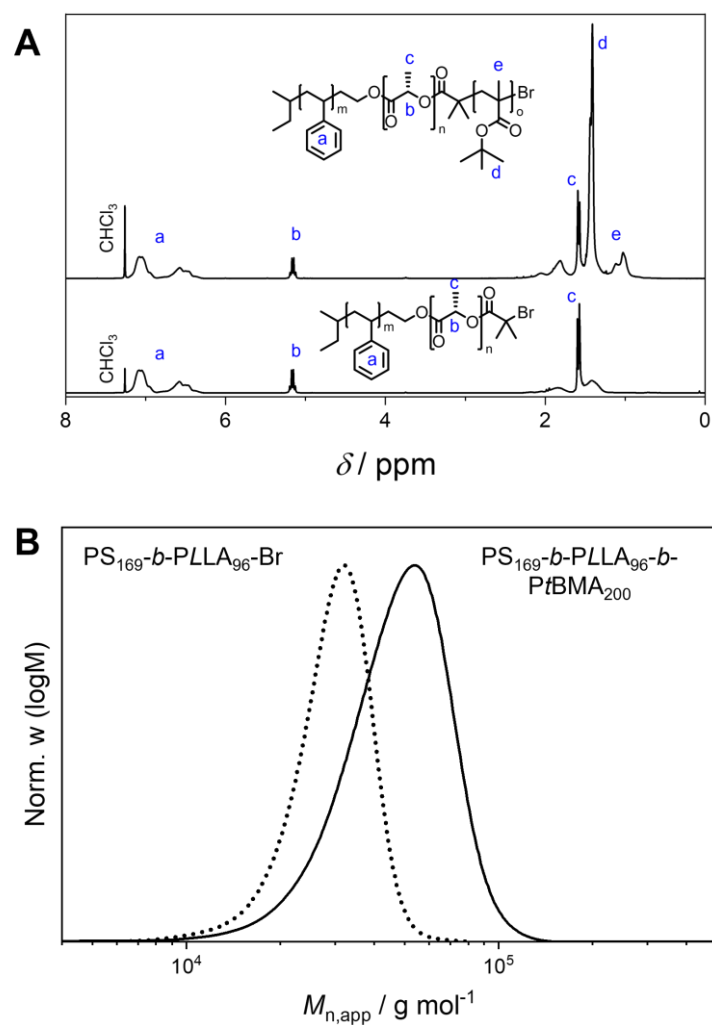

**Fig. S16:** A)  $^1\text{H}$  NMR ( $\text{CDCl}_3$ , 300 MHz) spectra and B) apparent molecular weight distributions ( $\text{CHCl}_3$ -SEC, PS calibration) of  $\text{PS}_{169}$ -*b*- $\text{PLLA}_{96}$ -Br and  $\text{PS}_{169}$ -*b*- $\text{PLLA}_{96}$ -*b*-PtBMA<sub>200</sub>.



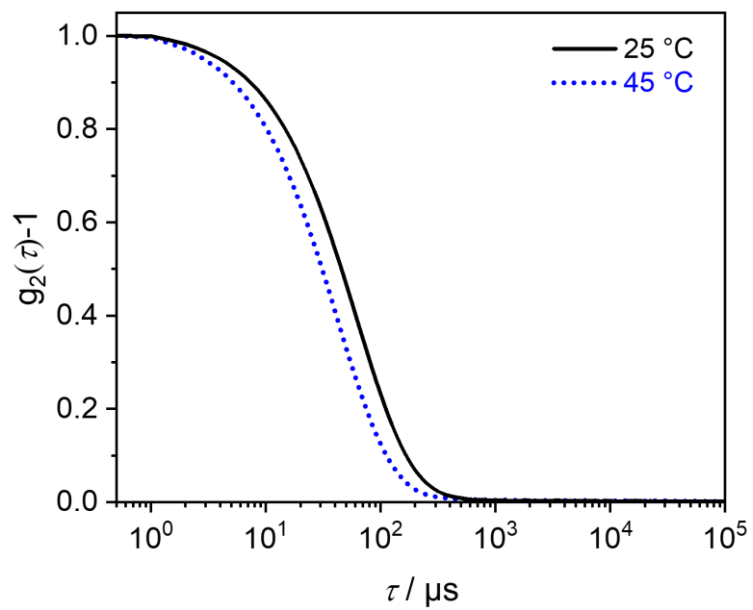

**Fig. S17:** Autocorrelation functions from DLS for PS-*b*-PLLA-*b*-PtBMA Janus micelles ( $c = 5 \text{ g L}^{-1}$ , CH) at 25 and 45 °C.
